# Supplementary material for: A Case Study of Behaviour and Performance of Confined or Pastured Cows During the Dry Period
Source: PubMed Central journal article supplement (PMC4961997; doi:10.3390/ani6070041), 2016-07-13
Supplement: animals-06-00041-s001.pdf [file animals-06-00041-s001.pdf]

## Supplementary Materials: A Case Study of Behaviour and Performance of Confined or Pastured Cows during the Dry Period

Randi A. Black and Peter D. Krawczel

**Table S1.** Cow-based assessment means  $\pm$  SD of cows housed on either pasture ( $n = 14$ ) or in freestalls ( $n = 14$ ) during the dry period.

| Parameter                         | Day              |                  |                  |                  |                  |                  |                  |                  |
|-----------------------------------|------------------|------------------|------------------|------------------|------------------|------------------|------------------|------------------|
|                                   | DO               |                  | CA               |                  | PP1              |                  | PP2              |                  |
|                                   | Freestall        | Pasture          | Freestall        | Pasture          | Freestall        | Pasture          | Freestall        | Pasture          |
| Hygiene score <sup>1</sup>        | 2.07 $\pm$ 0.27  | 2.14 $\pm$ 0.36  | 3.00 $\pm$ 0.68  | 2.79 $\pm$ 0.89  | 2.85 $\pm$ 0.80  | 2.64 $\pm$ 0.93  | 2.42 $\pm$ 0.67  | 2.36 $\pm$ 0.50  |
| Locomotion score <sup>2</sup>     | 1.36 $\pm$ 0.63  | 1.57 $\pm$ 0.65  | 1.64 $\pm$ 0.74  | 1.93 $\pm$ 0.73  | 1.77 $\pm$ 1.10  | 1.93 $\pm$ 0.73  | 1.58 $\pm$ 0.79  | 1.64 $\pm$ 0.84  |
| Body condition score <sup>3</sup> | 3.41 $\pm$ 0.25  | 3.29 $\pm$ 0.41  | 3.25 $\pm$ 0.23  | 3.06 $\pm$ 0.41  | 3.06 $\pm$ 0.25  | 2.95 $\pm$ 0.38  | 3.04 $\pm$ 0.30  | 2.80 $\pm$ 0.34  |
| Weight, kg                        | 668.6 $\pm$ 40.5 | 676.8 $\pm$ 95.0 | 695.8 $\pm$ 37.4 | 655.3 $\pm$ 79.0 | 651.3 $\pm$ 58.3 | 632.9 $\pm$ 72.3 | 636.7 $\pm$ 48.1 | 619.1 $\pm$ 78.4 |

<sup>1</sup> Hygiene measured using scoring system by (Reneau et al. [1]); <sup>2</sup> Locomotion measured using scoring system by (Flower and Weary [2]); <sup>3</sup> Body condition score measured using scoring system by (Wildman et al. [3]).

**Table S2.** Physiological measure means  $\pm$  SD of cows housed on either pasture ( $n = 14$ ) or in freestalls ( $n = 14$ ) during the dry period.

| Day | Housing         |                 |                         |                 |                 |                 |                           |                 |
|-----|-----------------|-----------------|-------------------------|-----------------|-----------------|-----------------|---------------------------|-----------------|
|     | Freestall       |                 |                         |                 | Pasture         |                 |                           |                 |
|     | Milk Fat, %     | Milk Protein, % | SCC, Cells/mL           | BHBA, mg/dL     | Milk Fat, %     | Milk Protein, % | SCC, Cells/mL             | BHBA, mg/dL     |
| 0   | 5.68 $\pm$ 2.60 | 8.79 $\pm$ 4.37 | 890,429 $\pm$ 1,022,770 | 0.48 $\pm$ 0.17 | 4.18 $\pm$ 1.34 | 8.63 $\pm$ 2.85 | 1,502,360 $\pm$ 1,458,420 | 0.46 $\pm$ 0.17 |
| 1   | 4.62 $\pm$ 1.95 | 6.08 $\pm$ 1.65 | 607,786 $\pm$ 670,639   | -               | 3.88 $\pm$ 1.46 | 6.07 $\pm$ 1.43 | 1,035,640 $\pm$ 1,035,870 | -               |
| 2   | 5.11 $\pm$ 1.58 | 5.42 $\pm$ 2.39 | 929,143 $\pm$ 1,789,920 | 0.62 $\pm$ 0.28 | 4.30 $\pm$ 1.14 | 5.28 $\pm$ 2.29 | 898,333 $\pm$ 1,234,870   | 0.55 $\pm$ 0.24 |
| 5   | -               | -               | -                       | 0.70 $\pm$ 0.29 | -               | -               | -                         | 0.64 $\pm$ 0.57 |
| 7   | 4.64 $\pm$ 1.08 | 3.83 $\pm$ 1.19 | 247,077 $\pm$ 526,620   | -               | 4.13 $\pm$ 0.94 | 3.74 $\pm$ 1.09 | 222,893 $\pm$ 271,798     | -               |
| 8   | -               | -               | -                       | 0.89 $\pm$ 0.70 | -               | -               | -                         | 0.43 $\pm$ 0.21 |
| 11  | -               | -               | -                       | 0.67 $\pm$ 0.69 | -               | -               | -                         | 0.39 $\pm$ 0.18 |
| 14  | 4.10 $\pm$ 0.60 | 3.11 $\pm$ 0.31 | 62,273 $\pm$ 123,725    | 0.58 $\pm$ 0.26 | 3.92 $\pm$ 1.45 | 3.17 $\pm$ 0.62 | 68,231 $\pm$ 75,654       | 0.41 $\pm$ 0.11 |

**Table S3.** Postpartum health disorder incidences of cows housed on either pasture ( $n = 14$ ) or in freestalls ( $n = 14$ ) during the dry period.

| Housing        | Health Disorder |          |          |                   |                    |                  |       | Total Cows <sup>1</sup> |
|----------------|-----------------|----------|----------|-------------------|--------------------|------------------|-------|-------------------------|
|                | Ketosis         | Mastitis | Metritis | Retained Placenta | Displaced Abomasum | Prolapsed Uterus | Death |                         |
| Freestall, $n$ | 2               | 1        | 8        | 2                 | 0                  | 1                | 1     | 10                      |
| Pasture, $n$   | 1               | 1        | 5        | 3                 | 1                  | 0                | 0     | 6                       |

<sup>1</sup> Total of number of cows which developed a health disorder during the study period.

## References

1. Reneau, J.K.; Seykora, A.J.; Heins, B.J.; Endres, M.I.; Farnsworth, R.J.; Bey, R.F. Association between hygiene scores and somatic cell scores in dairy cattle. *J. Am. Vet. Med. Assoc.* **2005**, *227*, 1297–1301.
2. Flower, F.C.; Weary, D.M. Effect of hoof pathologies on subjective assessments of dairy cow gait. *J. Dairy Sci.* **2006**, *89*, 139–146.
3. Wildman, E.E.; Jones, G.M.; Wagner, P.E.; Boman, R.L.; Troutt, H.F., Jr.; Lesch, T.N. A dairy cow body condition scoring system and its relationship to selected production characteristics. *J. Dairy Sci.* **1982**, *65*, 495–501.

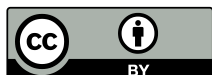

© 2016 by the authors; licensee MDPI, Basel, Switzerland. This article is an open access article distributed under the terms and conditions of the Creative Commons by Attribution (CC-BY) license (<http://creativecommons.org/licenses/by/4.0/>).
